# Supplementary material for: Kidney Cyst Lining Epithelial Cells Are Resistant to Low-Dose Cisplatin-Induced DNA Damage in a Preclinical Model of Autosomal Dominant Polycystic Kidney Disease
Source: MDPI journal article supplement (doi:10.3390/ijms232012547), 2022-10-19

**Figure S1.** Representative images of PAS staining (upper panel) and immunostaining for  $\gamma$ H2AX (bottom panel) of Pkd1RC/RC/Atm+/- mice kidneys showing dose response to cisplatin (0.1 mg/kg to 7.0 mg/kg) at 72 hours post injection. Scale bar = 50  $\mu$ m.

**Figure S2.** Morphological staining (PAS) of Pkd1RC/RC/Atm+/- mice kidney sections at 3 weeks post cisplatin injections (1 mg/kg or 7 mg/kg) or vehicle. Scale bar = 1mm.

**Figure S3.** Immunohistochemical staining for F4/80 in Pkd1RC/RC/Atm+/- mice kidney sections at 3 weeks post cisplatin injections (1 mg/kg or 7 mg/kg) or vehicle (7 mg/kg). Scale bar = 1mm.

**Figure S4.** Sirius red staining indicating fibrosis (pink) in Pkd1RC/RC/Atm+/- mice kidney sections at 3 weeks post cisplatin injections (1 mg/kg or 7 mg/kg) or vehicle (7 mg/kg). Scale bar = 200  $\mu$ m.

**Figure S5.** Immunostaining for  $\alpha$ SMA in Pkd1RC/RC/Atm+/- mice kidney sections at 3 weeks post cisplatin injections (1 mg/kg or 7 mg/kg) or vehicle (7 mg/kg). Scale bar = 1mm.



Figure S1

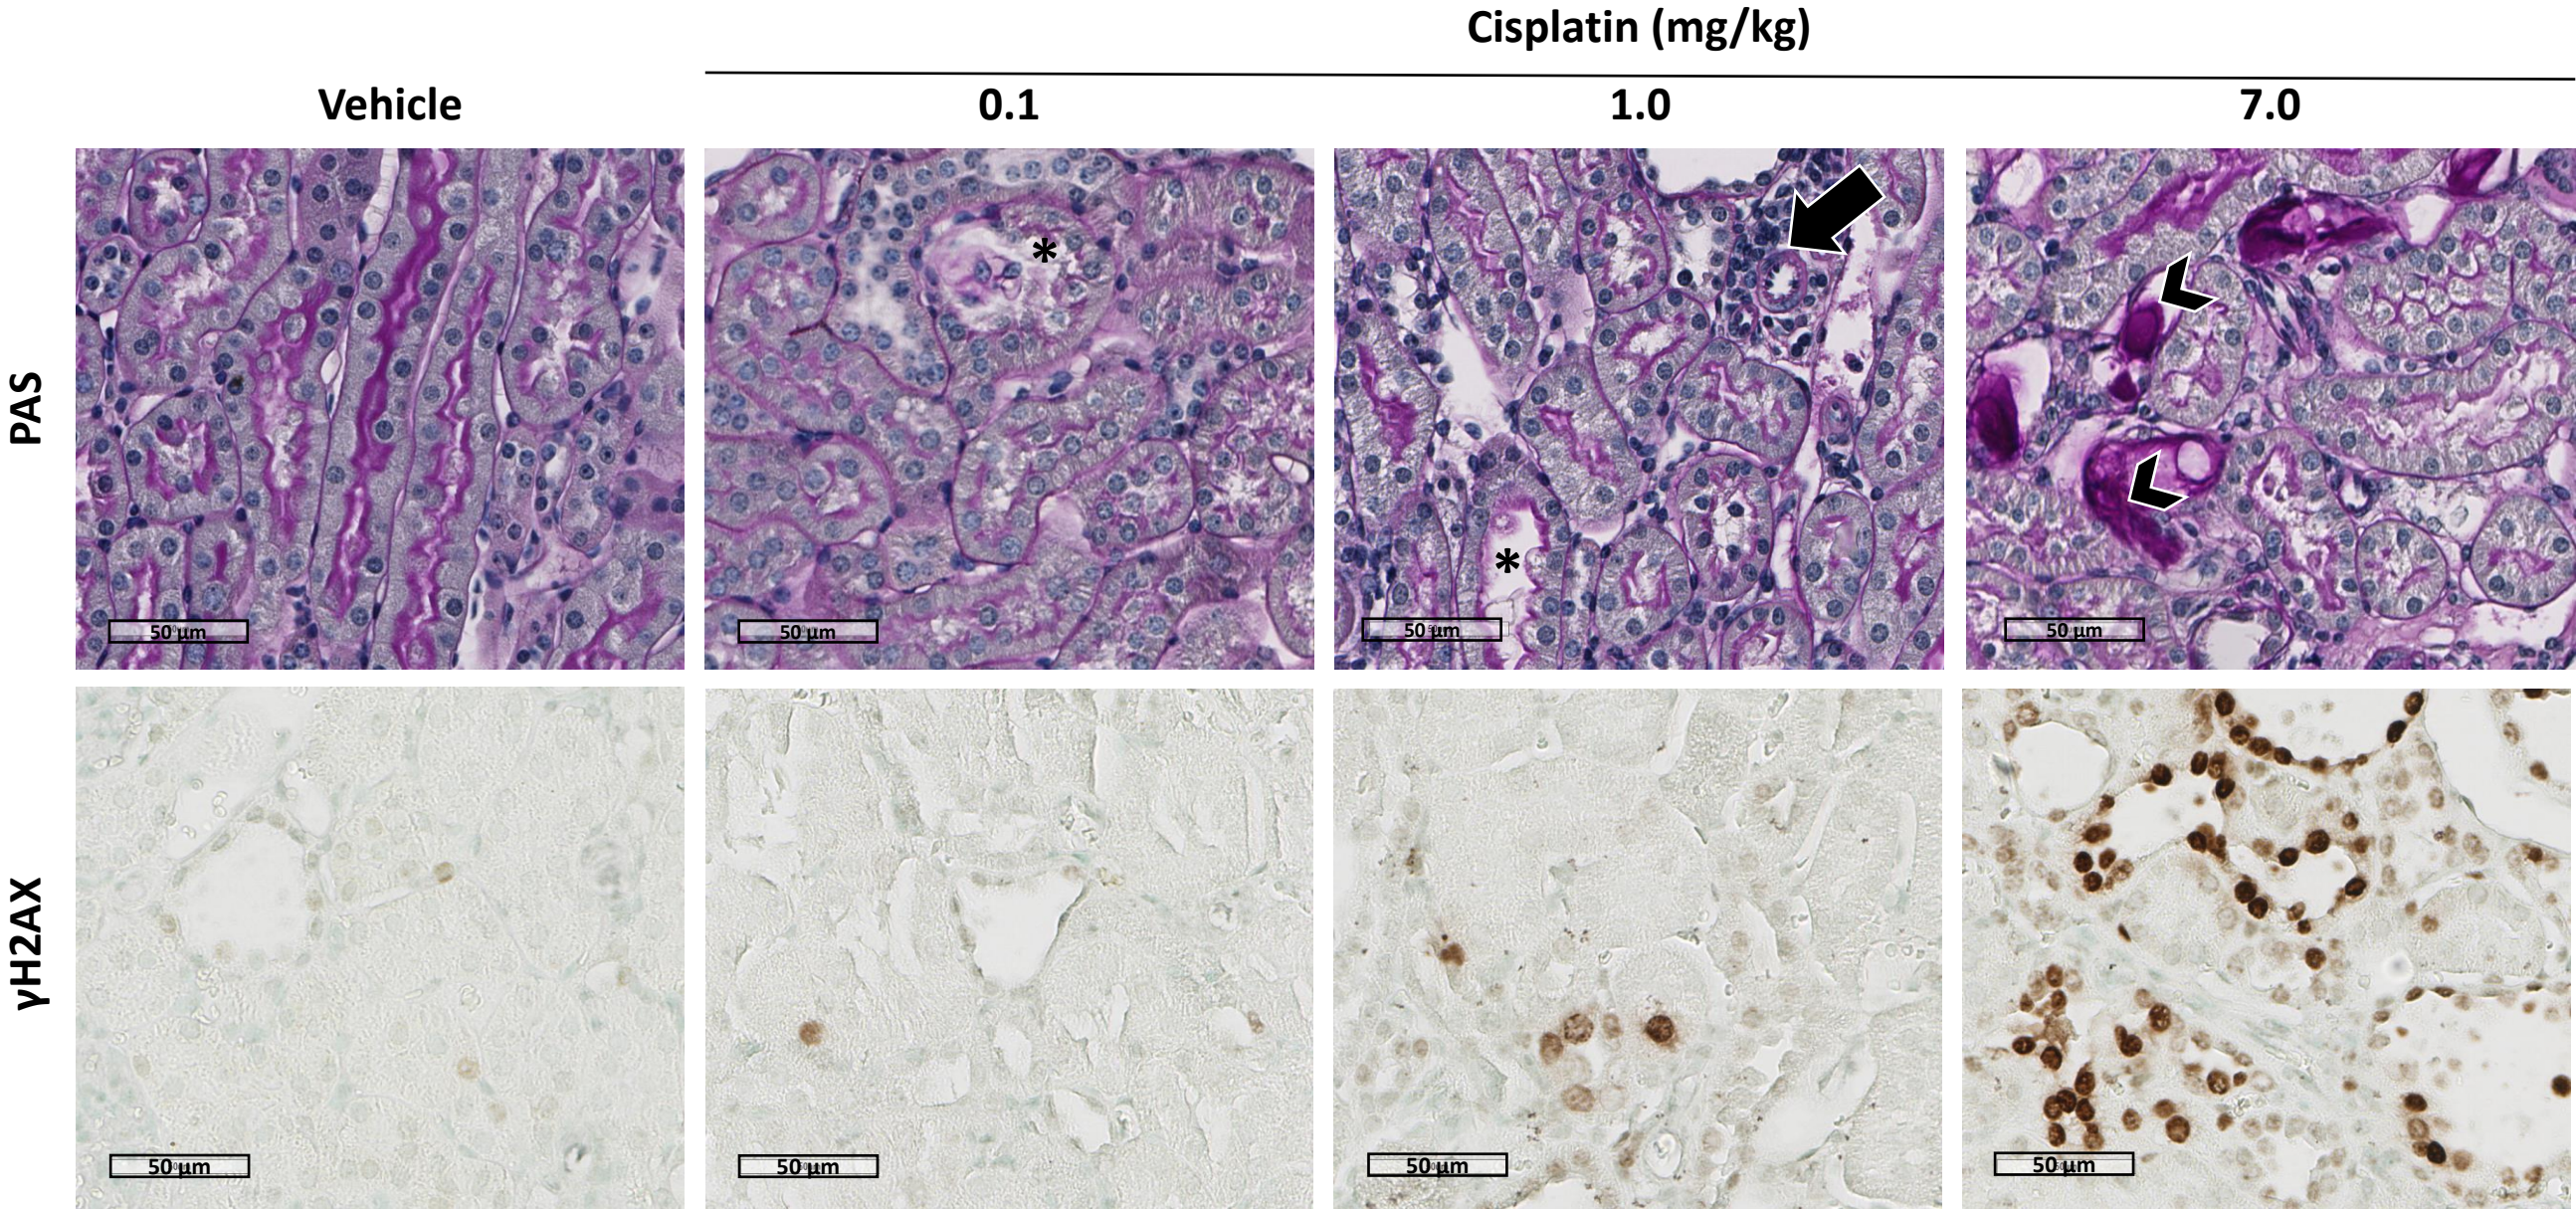



Figure S2

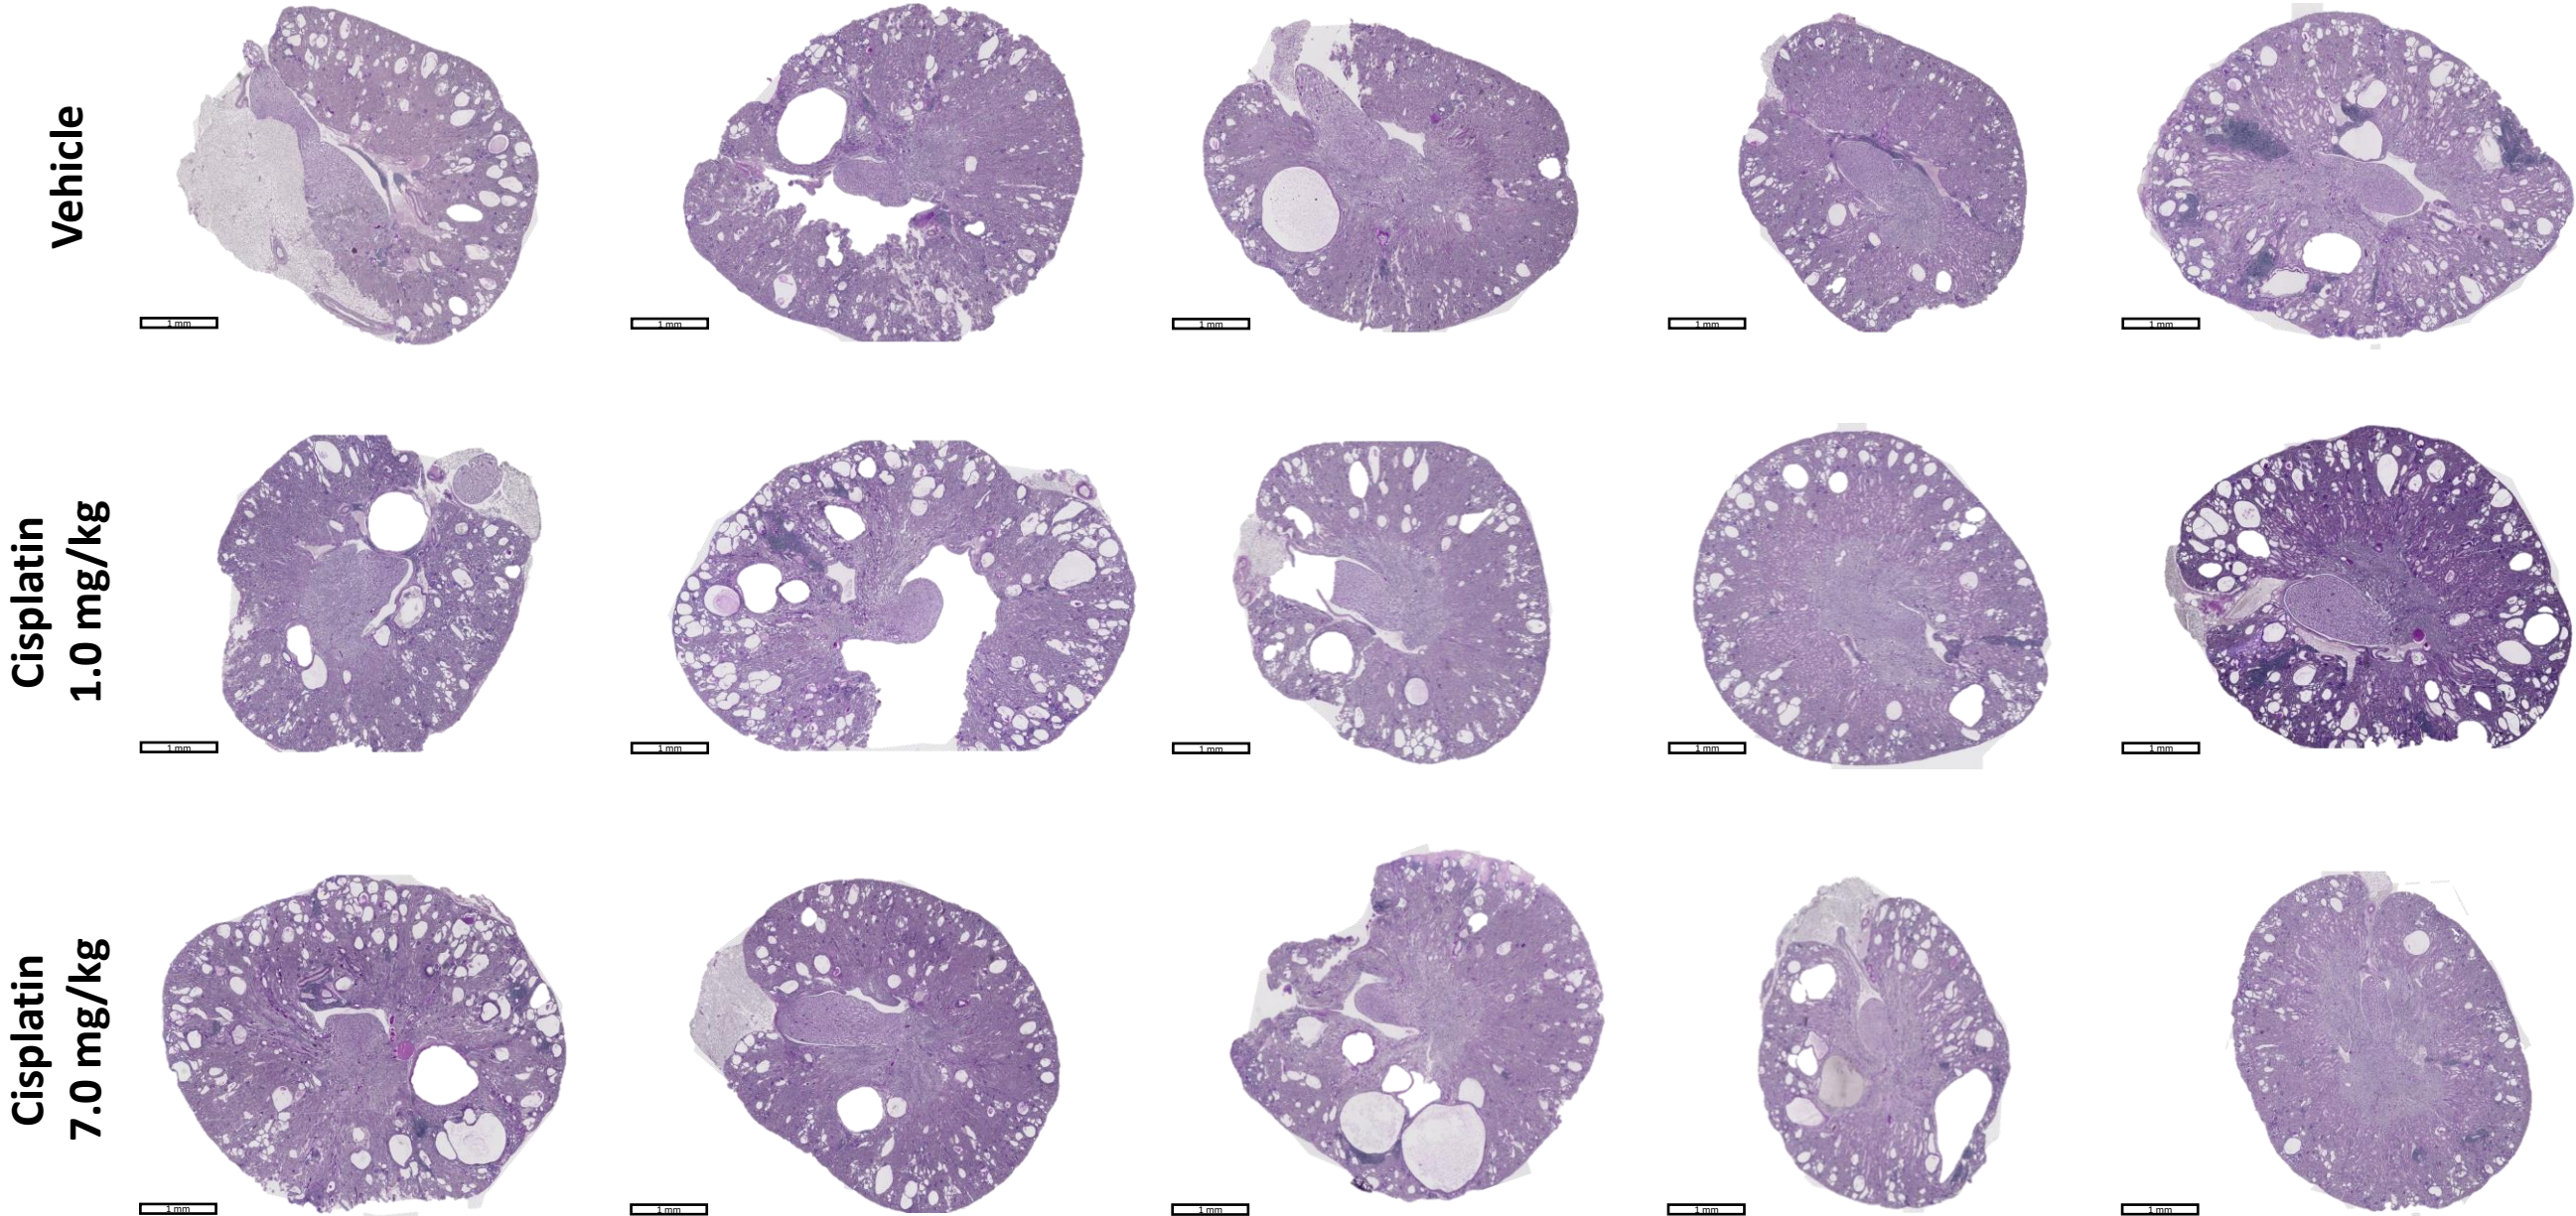



Figure S3

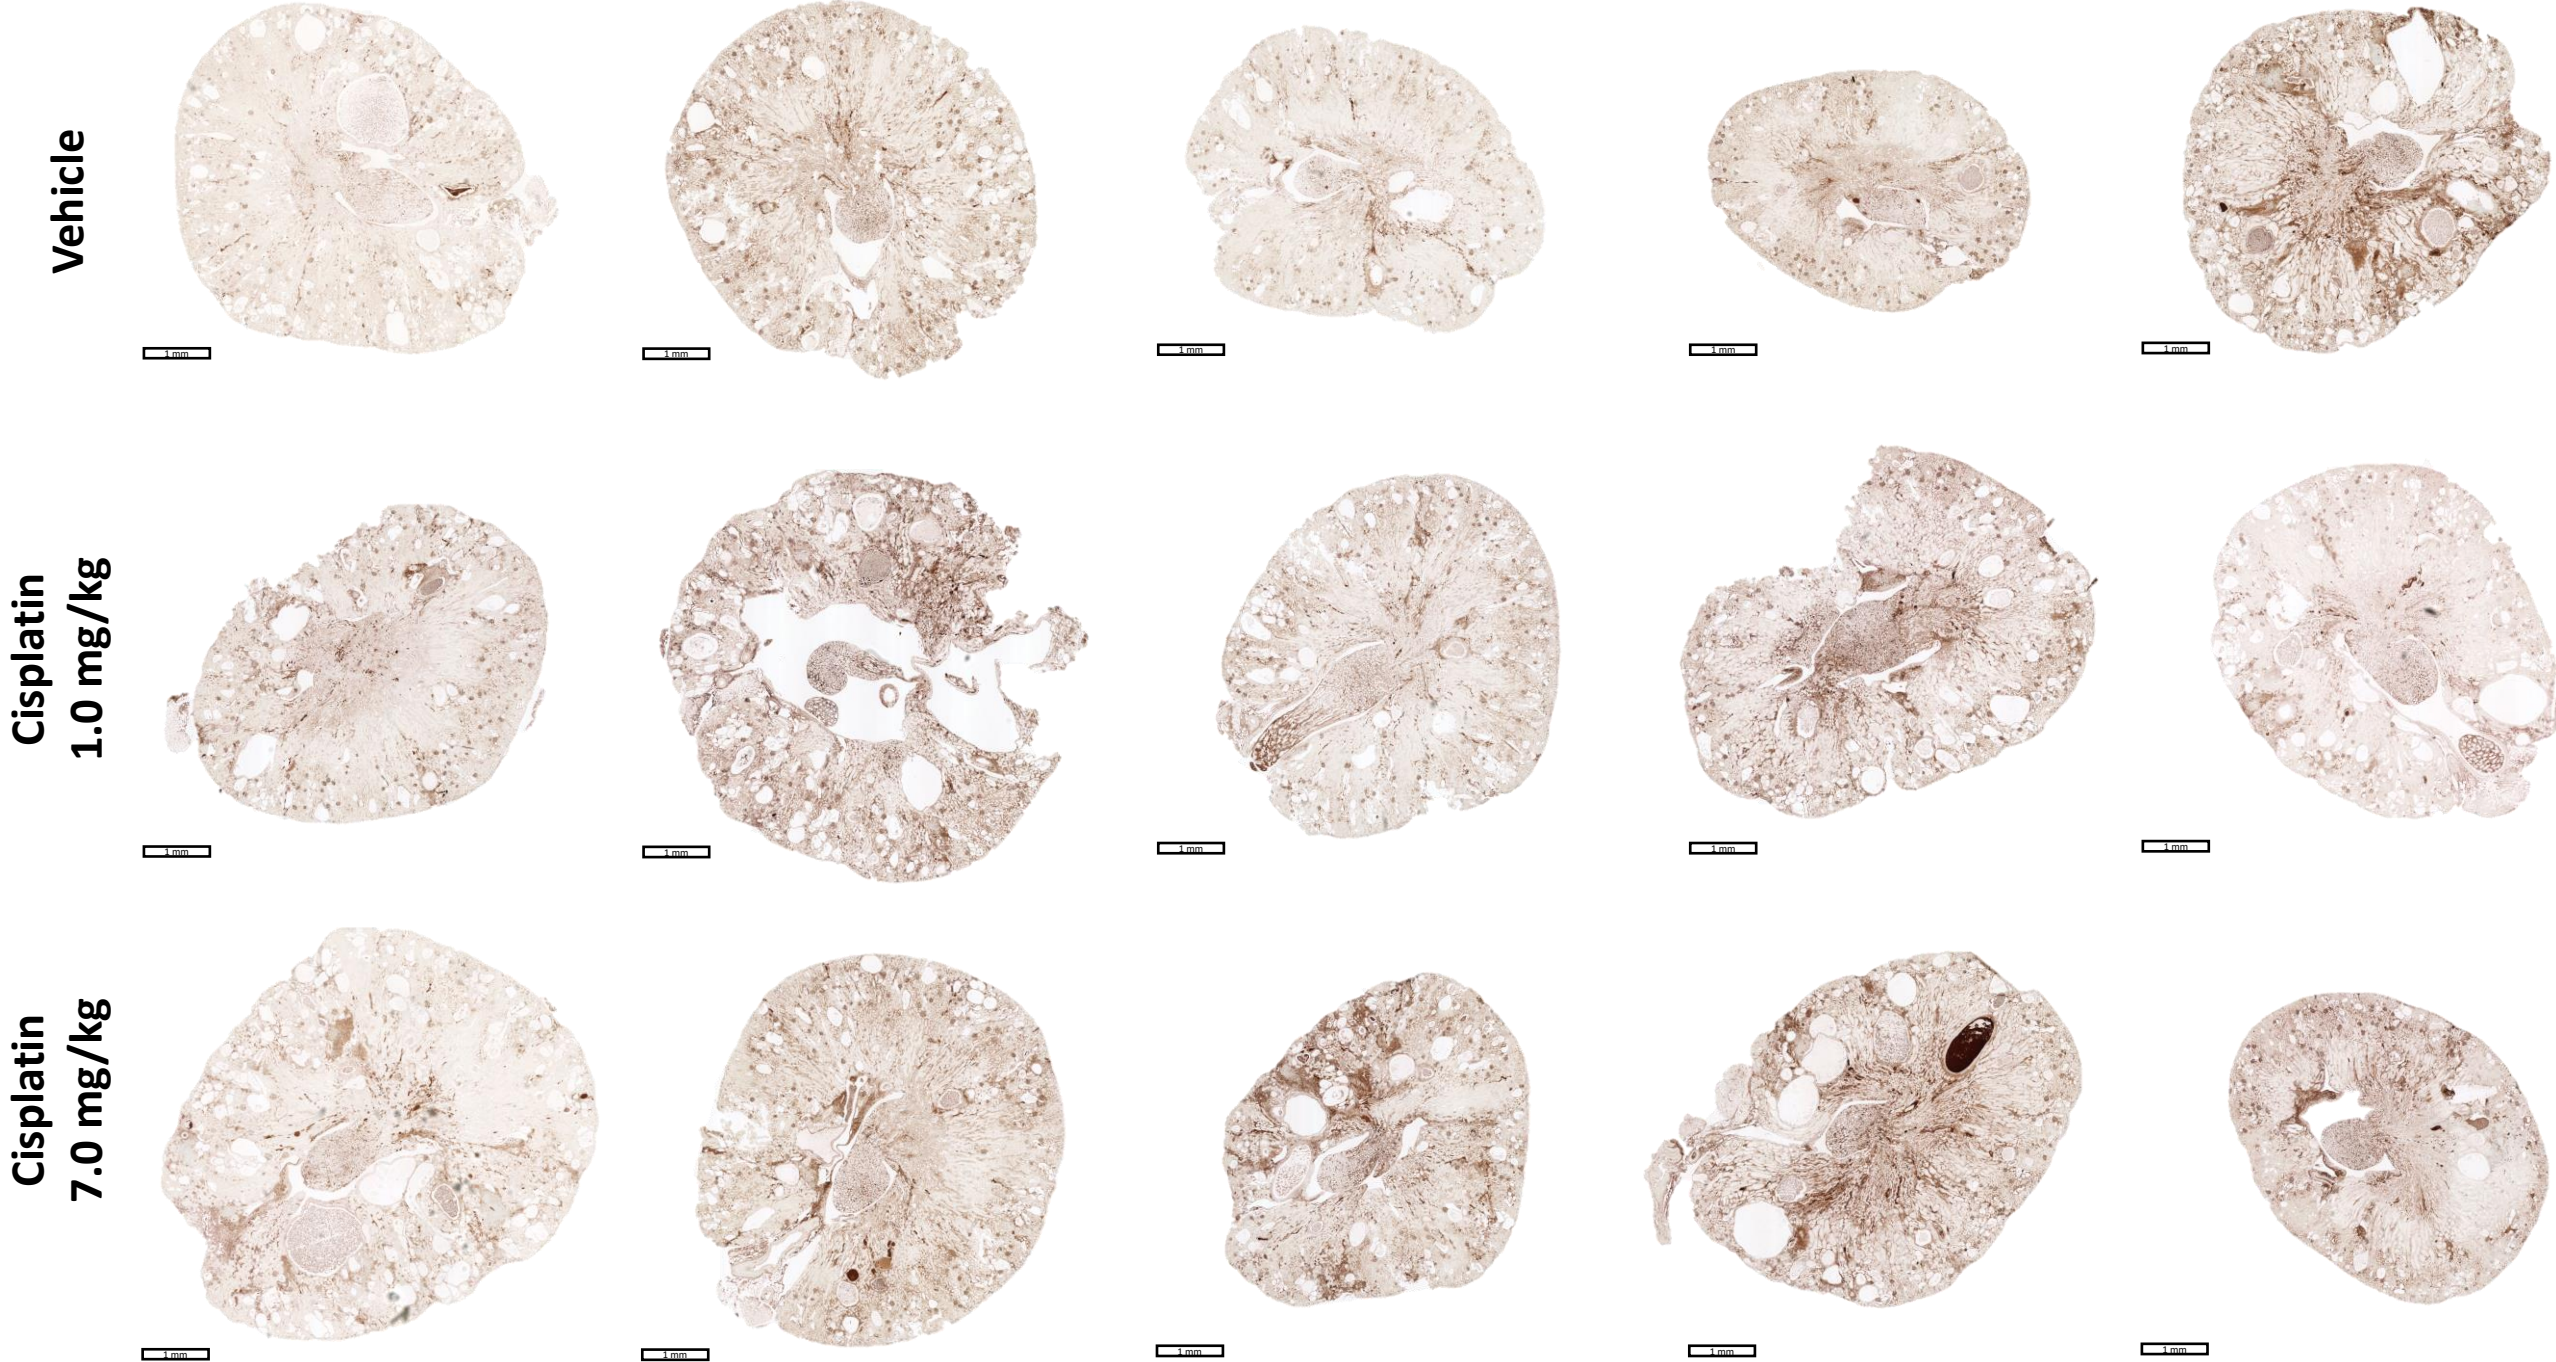



**Figure S4**

**Vehicle**

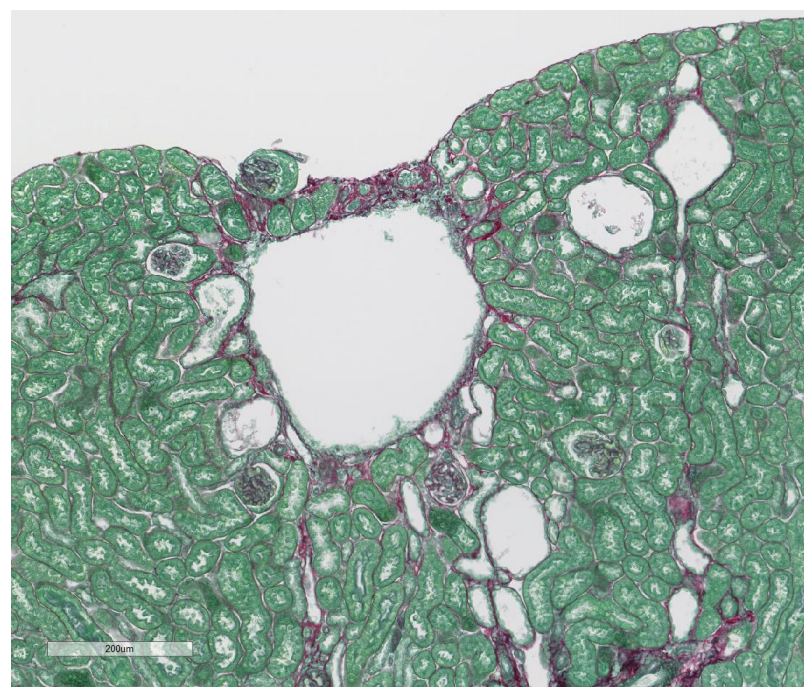

**Cisplatin  
1.0 mg/kg**

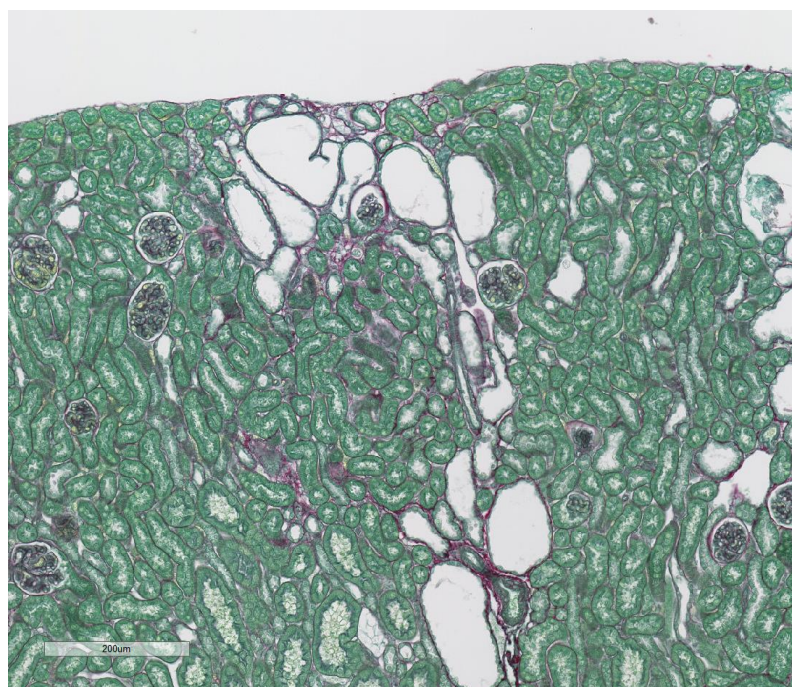

**Cisplatin  
7.0 mg/kg**

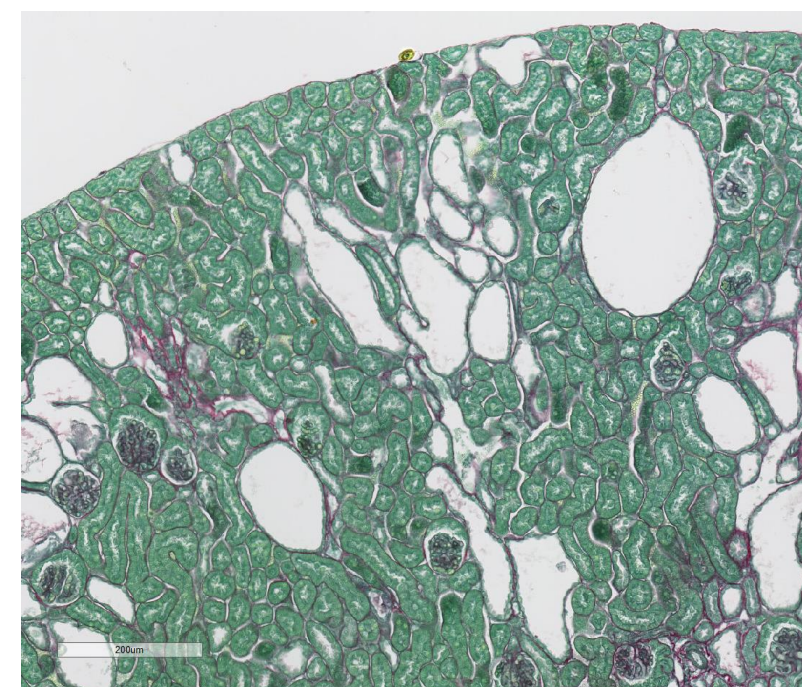



**Figure S5**

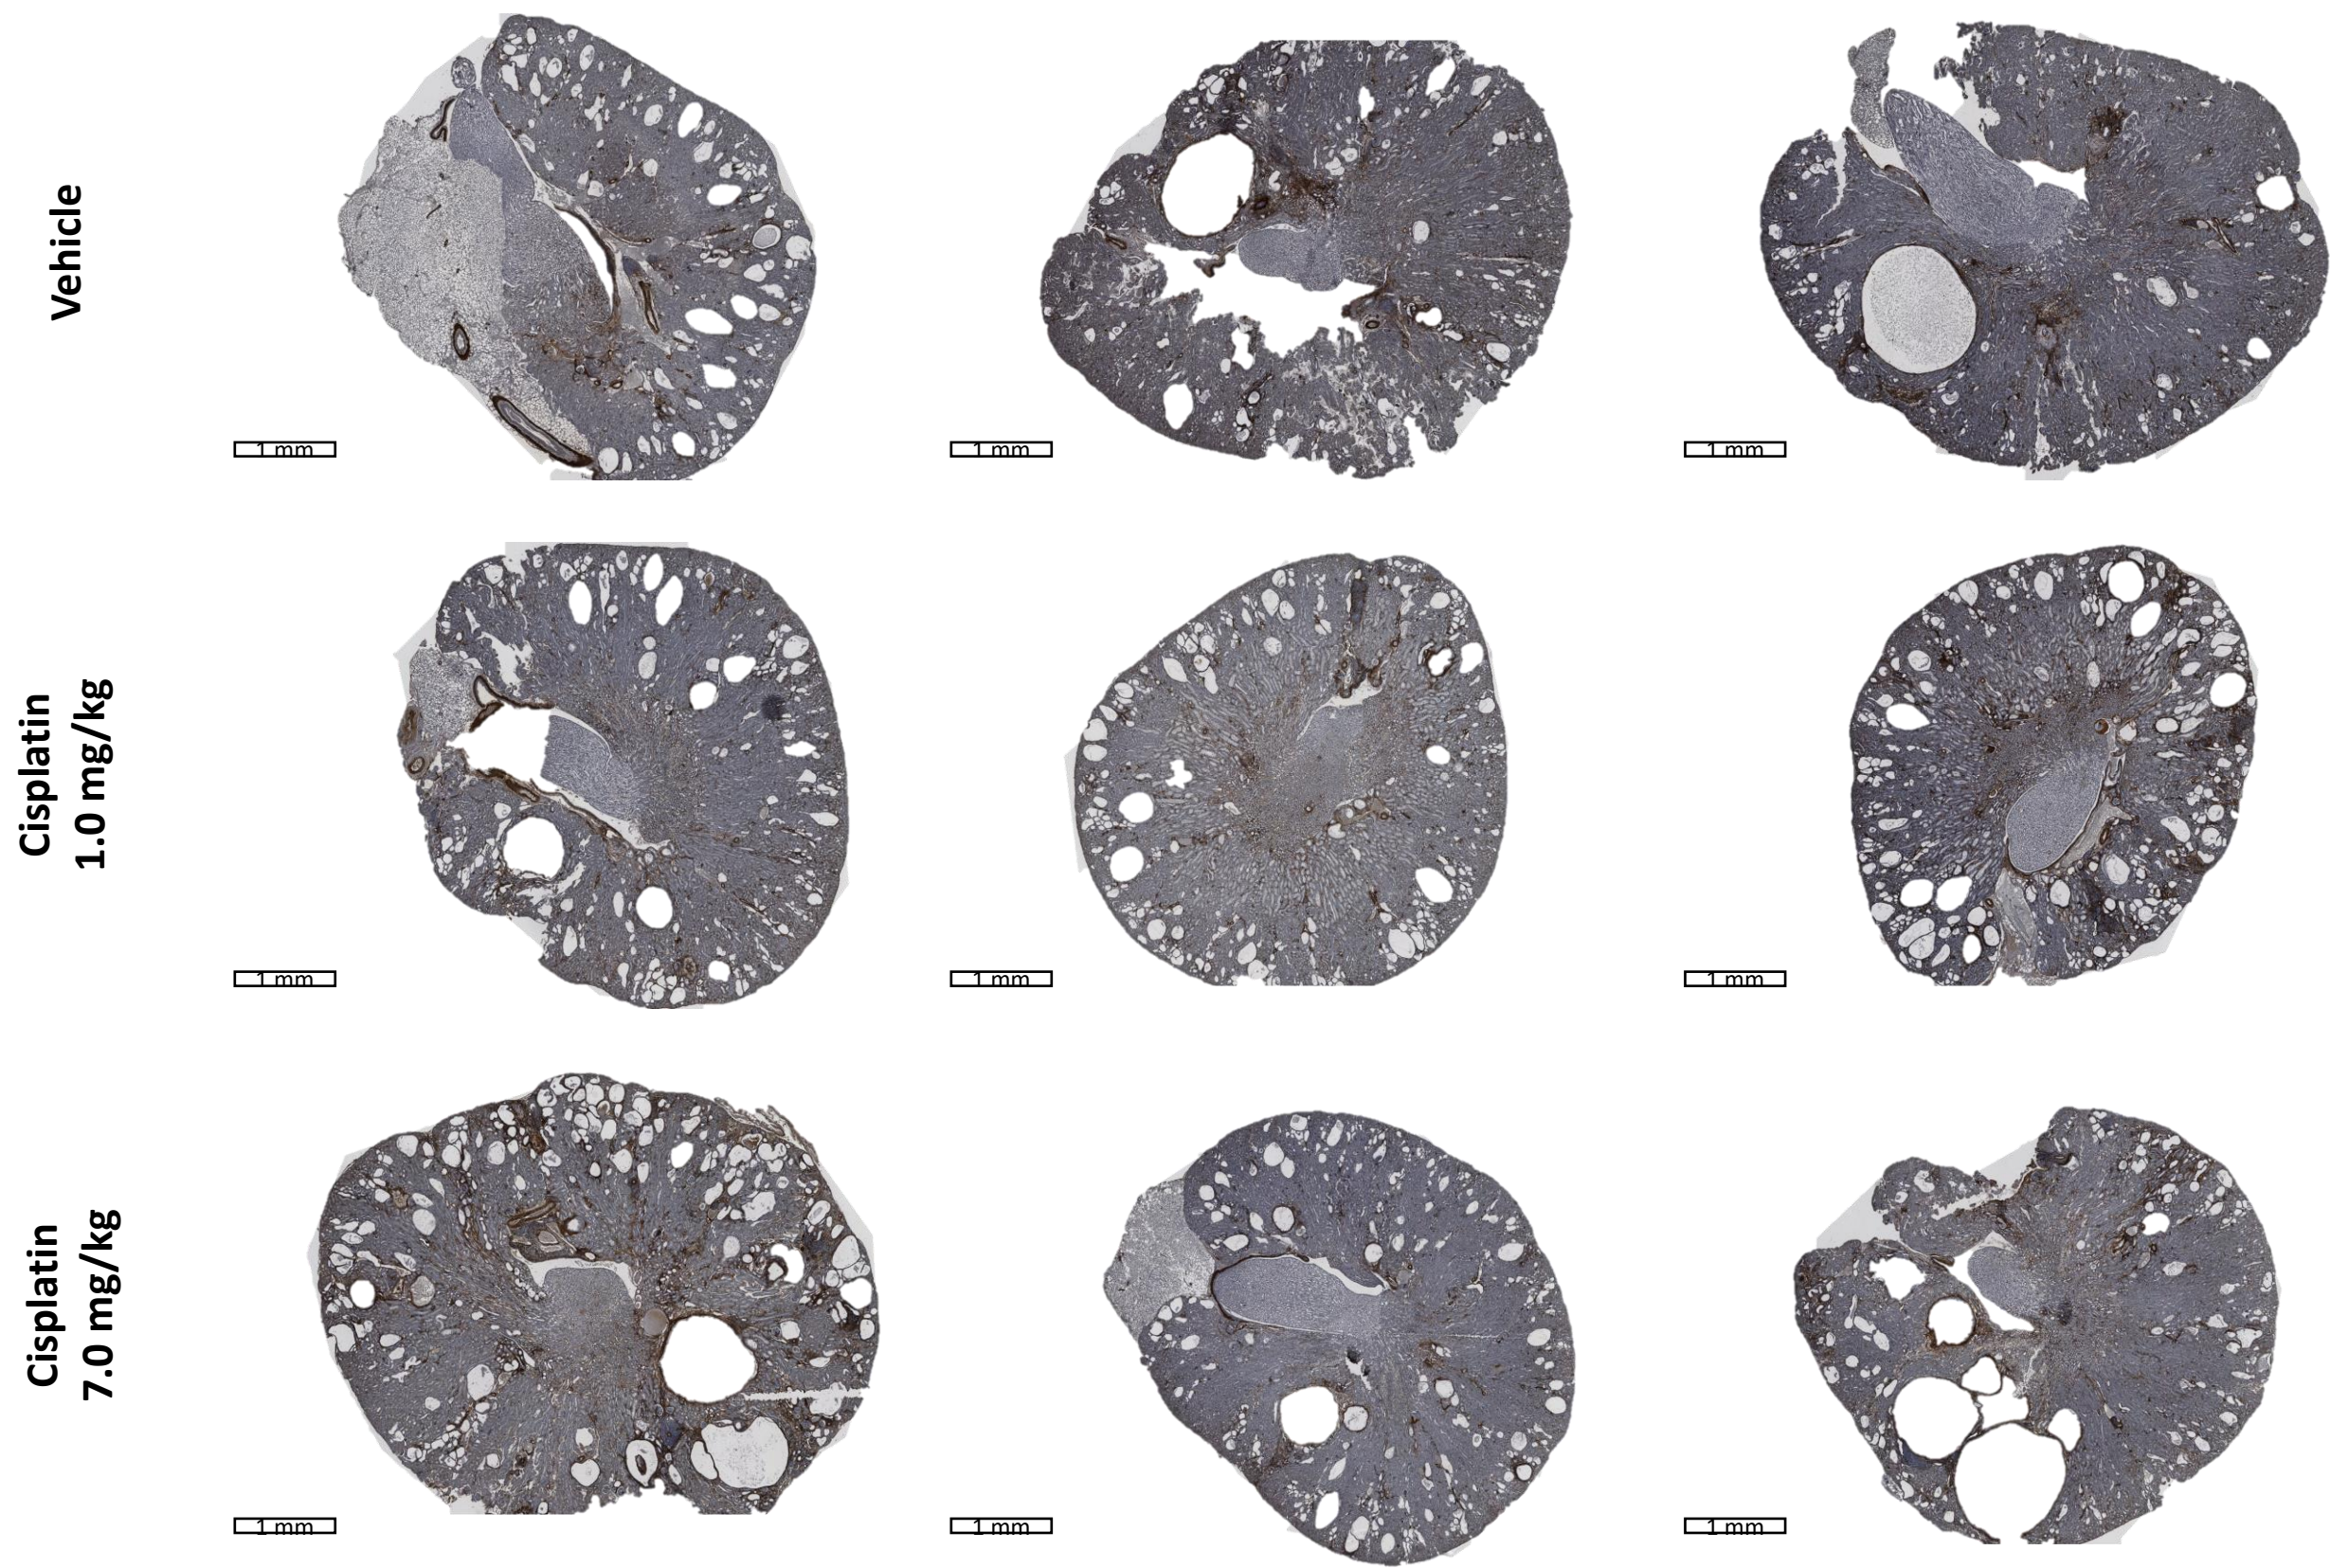

Supplement: s1 [file s1]
